# Supplementary material for: Psychosocial stress and cortisol stress reactivity predict breast milk composition
Source: Springer Nature journal article supplement (doi:10.1038/s41598-021-90980-3), 2021-06-02
Supplement: 41598_2021_90980_MOESM1_ESM.pdf [file 41598_2021_90980_MOESM1_ESM.pdf]

## Psychosocial stress and cortisol stress reactivity predict breast milk composition

Anna Ziomkiewicz\* <sup>1, 2</sup>, Magdalena Babiszewska <sup>2</sup>, Anna Apanasewicz <sup>2</sup>, Magdalena Piosek <sup>3</sup>, Patrycja Wychowaniec <sup>4</sup>, Agnieszka Cierniak <sup>5</sup>, Olga Barbarska <sup>6</sup>, Marek Szołtysik <sup>7</sup>, Dariusz Danel<sup>2</sup>, Szymon Wichary <sup>8</sup>

1. Institute of Zoology and Biomedical Sciences, Jagiellonian University, Gronostajowa 9, 30-387, Kraków, Poland

2. Ludwik Hirszfeld Institute of Immunology and Experimental Therapy, Polish Academy of Sciences, Rudolfa Weigla 12, 53-114 Wrocław, Poland

3. Institute of Psychology, University of Wrocław, J.W. Dawida 1, 50-527 Wrocław, Poland

4. Faculty of Biology, Department of Human Biology, University of Wrocław, Szewska 48, 50-139 Wrocław, Poland

5. Faculty of Medicine and Health Sciences, Andrzej Frycz Modrzewski Krakow University, Gustawa Herlinga-Grudzinskiego 1, 30-705 Krakow, Poland

6. Laboratory of Human Milk and Lactation Research at Regional Human Milk Bank in Holy Family Hospital, Faculty of Health Sciences, Medical University of Warsaw, Zwirki i Wigury 63a, 02-091 Warsaw, Poland

7. Faculty of Biotechnology and Food Science, Wrocław University of Environmental and Life Sciences, J. Chelmonskiego 37, 51-630 Wrocław

8. Institute of Psychology, Jagiellonian University, Ingardena 6, 30-060 Krakow, Poland

\*anna.ziomkiewicz-wichary@uj.edu.plSupplementary Materials

## Maternal and infant anthropometrics

Maternal height was measured using a stadiometer. Weight and body fat were measured with Tanita SC-240 MA Body Scale (Tanita Corp., Japan). Infant weight was measured to the nearest 1 g by using a hospital analog infant scale. The supine length was measured to the nearest 0.1 cm using an infant measuring board (Seca GmbH, Germany).

## Breast milk sample analysis

### Content of macronutrients

Milk samples of 10 ml were slowly warmed to 40 °C before testing and homogenized with MIRIS Sonicator (an ultrasonic homogenizer) (1.5 s/1 ml ). Each sample was tested three times, using 3 ml of milk per one replication, and the average from 3 measurements was reported.

### Content of fatty acids

Separation was carried out under the following conditions: column HP-88 (100m x 0,250 mm x 0.20 µm), column temperature from 70°C (5min) to 240°C (4°C/min), the carrier gas - helium (20 cm/s), injection spray 1µl, 260°C, split 100:1. DHA and AA were identified based on retention times obtained for standards and by comparing their mass spectra with the standards.

### Salivary sample analysis

Enzyme-linked immunosorbent assays is a solid phase based on the principle of competitive binding. The optical density was determined with a microplate reader (LEDETECT96, Labexim Products, Austria) at 450 nm. The sensitivity provided by the manufacturer is 0,09 ng/ml, with a detection range of 0,09 - 30 ng/ml. All the analyzed samples fell into this range.
